# Supplementary material for: Endospores of thermophilic bacteria as tracers of microbial dispersal by ocean currents
Source: PubMed Central journal article supplement — ISME J. 2013 Dec 19;8(6):1153–65. doi: 10.1038/ismej.2013.225 (PMC4030223; doi:10.1038/ismej.2013.225), 2013-12-19
Supplement: ismej2013225x1.pdf [file ismej2013225x1.pdf]

# 1 **Supplementary Information**

2

## 3 **Supplementary Materials and Methods**

4

### 5 **Alpha and beta diversity**

6 Alpha diversity metrics (observed phylotype richness, Chao1 richness, Shannon index, equitability index,  
7 and Simpson index), sampling coverage, and principal coordinates analysis of samples based on  
8 weighted UniFrac distances (Lozupone & Knight, 2005) were calculated using QIIME (Caporaso et al,  
9 2010) with re-sampling (bootstrapping and jackknifing: 1000 re-samples) at 800 reads to avoid sample  
10 size based artifacts (Lozupone et al, 2011).

11

### 12 **Environmental distribution of putative thermophilic endospore phlotypes**

13 The Short Read Archive (SRA) database (Kodama et al, 2012) was screened (May 2013) for metagenomic  
14 datasets containing 16S rRNA gene sequences obtained by PCR amplification and sequencing using the  
15 454 platform. 226 amplicon metagenome files were downloaded and the sequences contained in them  
16 were extracted using fastq-dump (part of SRA tools freely available in SRA site) into environmental  
17 categories according to the NCBI taxonomic classification of their environmental origin (46 metagenomic  
18 categories). In addition, all datasets of the VAMPS database (<http://vamps.mbl.edu>) spanning variable  
19 regions V4 to V6 were downloaded (May 2013). Finally, using makeblastdb (available in the NCBI BLAST  
20 stand-alone distributions) those files were formatted into databases containing a total of 36,178,644  
21 sequences. Since these datasets contain short amplicon sequences of different regions of the 16S rRNA  
22 gene, the use of representative thermospore phlotype sequences as BLAST queries only yield results in  
23 the subset database sequences from the same region. Thus to simultaneously access all datasets for the

24 presence of thermospore phylotypes, we used proxy sequences of almost full length (>1400 nt) as  
25 queries. Proxy sequences were selected by BLAST searching [(Altschul et al, 1990) megablast default  
26 options] representative sequences of thermospore phylotypes against the NCBI nucleotide database  
27 (Wheeler et al, 2008) to identify, whenever possible, the closest, near full-length 16S rRNA sequences.  
28 Full-length sequences were only considered proxies of thermospore phylotypes if they shared more  
29 than 97% sequence identity across more than 80% of the query length. The BLAST hits for each proxy  
30 were quality filtered (longer than 300 nt with more than 97% identity across more than 80% of the  
31 amplicon length) and the results were normalized as relative abundance of the obtained sequences  
32 compared to the total number of sequences (longer than 300 nt) for each dataset. In addition, the L4-  
33 DeepSeq dataset (containing ~10 million 16S rRNA V6 reads from a deeply sequenced site in the English  
34 Channel) (Gibbons et al, 2013) was downloaded from the European Nucleotide Archive (ENA accession:  
35 [PRJEB3249](#)) and formatted to a database as described above. The full-length proxies of the thermospore  
36 phylotypes were then used as BLAST queries. Positive hits (>30 nt, ≥97% similarity, ≥80% coverage) were  
37 normalized against the 10,786,733 sequences longer than 30 nt in this dataset.

38

39

## 40 **Supplementary Results and Discussion**

41

### 42 **Detecting thermophilic endospores as indicators for passive dispersal in the ocean**

43 Direct identification of thermophilic endospores by DNA-based molecular methods is hampered by  
44 difficulties in (i) efficient DNA extraction from low abundant spores in marine sediments and (ii)  
45 distinguishing DNA from spores and vegetative cells in environmental nucleic acids extracts. Hence, an  
46 alternative means to identify thermophilic endospores is to record significant changes in community  
47 structure that are due to endospore germination and growth in incubations of pasteurized sediments at

48 high temperature. We initially evaluated different incubation conditions and times (56 h, 72 h, and 120  
49 h) to increase the recovery of thermospore phylotypes from sediments of Svalbard stations J and A,  
50 and/or Aarhus Bay station M5. The temperature was set to 50°C because previous studies have shown  
51 that maximal thermophilic sulfate reduction rates and numbers of endospore-forming, sulfate-reducing  
52 *Desulfotomaculum* phylotypes were obtained at incubation temperatures of about 50°C (de Rezende et  
53 al, 2013; Hubert et al, 2009). Amendment of sediment incubations with a mixture of formate, lactate,  
54 acetate, succinate, propionate, butyrate, and ethanol and/or freeze-dried *Spirulina* cells considerably  
55 increased the number of detected thermospore phylotypes compared to incubations without  
56 supplemental organic compounds (Supplementary Figure S1A). To confirm that *Spirulina* cells were free  
57 of viable thermophiles, they were incubated under the same conditions as the sediment samples and no  
58 growth/enrichment was observed. While there were some differences in the identity of the phylotypes  
59 detected after different incubation times, more thermospore phylotypes were detected after longer  
60 incubation (Supplementary Figure S1B) and thus all subsequent incubations were performed for 120 h.  
61 While still not all thermophilic endospores may germinate and grow under these incubation conditions,  
62 the amendment of incubations with organic compounds has a normalizing effect on endospore recovery  
63 by providing similar germination conditions in all sediments and thus allows comparative analysis of  
64 spore phylotype richness between different locations. Surveys of 16S rRNA gene sequence diversity are  
65 commonly used for studies of microbial biogeography (Chu et al, 2010; Fierer et al, 2009; Galand et al,  
66 2010; Horner-Devine et al, 2004; Martiny et al, 2011; Nemergut et al, 2011), although the phylogenetic  
67 resolution of the 16S rRNA gene is limited to species-level phylotypes or higher order taxa and some  
68 microbial biogeography patterns only become apparent at the strain-level (Cho & Tiedje, 2000; García-  
69 Martínez & Rodríguez-Valera, 2000; Miller et al, 2006; Papke et al, 2003; Silva et al, 2005; Whitaker et al,  
70 2003). Despite this acknowledged caveat, we used 16S rRNA as phylogenetic marker for our study also  
71 because the high sequence conservation renders this gene particularly advantageous for selective

72 analysis of passive dispersal. Mutations in the 16S rRNA gene due to genetic drift are less likely to occur  
73 compared to mutations in other, more variable genetic markers.

74

#### 75 **Potential physiology of thermospore phylotypes**

76 Previous analyses have shown that anoxic high temperature incubation resuscitates a diverse  
77 community of dormant *Firmicutes* that collectively catalyze the interdependent series of organic carbon  
78 degradation transformations i.e. hydrolysis, fermentation, and mineralization through sulfate  
79 respiration (Hubert et al, 2010). The majority of thermospore phylotypes identified in this study belong  
80 to the class *Clostridia* (Supplementary Table S3, Supplementary Figure S3). *Clostridia* are anaerobic  
81 microorganisms that can ferment a wide range of organic compounds and produce a variety of  
82 metabolites (reviewed in Tracy et al, 2012). In addition, they produce extracellular enzymes to degrade  
83 large biological molecules into fermentable components. Thermospore phylotypes with  $\geq 97\%$  16S rRNA  
84 sequence similarity to e.g. *Anaerosalibacter bizertensis*, *Brassicibacter mesophilus*, *Caloranaerobacter*  
85 *azorensis*, *Clostridium* spp., *Sporosalibacterium faouarense* (Supplementary Table S3) were thus likely  
86 involved in hydrolysis and fermentation (Fang et al, 2012; Rezgui et al, 2011; Wery et al, 2001; Wiegel et  
87 al, 1989) of complex substrates present in the sediments and the supplied *Spirulina* cells. In contrast,  
88 thermospore phylotypes related to known sulfate reducers of the genus *Desulfotomaculum* (Fardeau et  
89 al, 1995) and the iron reducer *Tepidimicrobium ferriphilum* (Slobodkin et al, 2006) probably used the  
90 amended organic compounds and products from primary fermenters as electron donors for  
91 thermophilic reduction of sulfate and iron, respectively, in the anoxic, high-temperature incubations.  
92 Thermospore phylotypes belonging to the class *Bacilli* were mostly related to facultative (e.g.  
93 *Anoxybacillus flavithermus*, *Bacillus azotoformans*, *B. licheniformis*, *B. thermoamylovorans*, *B.*  
94 *thermolactis*, *Geobacillus thermoglucosidasius*, *Microaerobacter geothermalis*, *Virgibacillus proomii*) and  
95 obligate anaerobes (e.g. *Anaerobacillus alkalilustre*, *Bacillus infernus*, *Vulcanibacillus modesticaldus*)



96 (Supplementary Table S3). The metabolic capabilities of these *Bacilli*-related phylotypes are presumably  
97 as diverse as those of their next cultivated relatives, which are capable of hydrolysis, fermentation,  
98 and/or anaerobic respiration with nitrate, iron, manganese or arsenate as electron acceptors (Boone et  
99 al, 1995; Khelifi et al, 2010; L'Haridon et al, 2006; Voigt et al, 2006; Zavarzina et al, 2009).

100

### 101 **Sequences belonging to thermophilic endospore-forming phylotypes are rare in available 16S rRNA** 102 **sequence datasets**

103 In order to gain insights into the general environmental distribution of thermospore phylotypes, we  
104 screened all available 16S rRNA amplicon datasets (that were deposited until May 2013 in the SRA  
105 database) for the presence of sequences with  $\geq 97\%$  similarity to near full-length proxy sequences of  
106 thermospore phylotypes. The use of proxy sequences was necessary because different amplicon  
107 sequencing studies targeted different regions of the 16S rRNA gene. We obtained suitable proxy full-  
108 length sequences ( $>1400$  nt,  $\geq 97\%$  similarity,  $>80\%$  coverage) for 78 of 146 thermospore phylotypes. Of  
109 over 36 million sequences analyzed in total only 0.005% were closely affiliated with thermospore  
110 phylotypes (Supplementary Table S4). Surprisingly, most of these hits were obtained with sequences  
111 from bioreactors and intestinal microbiomes. While these anoxic environments support presence of  
112 similar but not necessarily thermophilic bacteria, they are unlikely major sources of marine thermophilic  
113 endospores. In the datasets from marine environments (i.e., sediments, surface water, sponges, fish,  
114 hydrothermal vents, cold-seeps), sequences affiliated with thermospore phylotypes were only present  
115 at a very low relative abundance of 0.0003% ( $n=363/1,132,627$ ). 93% of these hits ( $n=338/363$ ) were  
116 derived from proxies of the cosmopolitan thermospore phylotypes TSP003, TSP005, TSP007, TSP010,  
117 TSP013, TSP016, TSP0017 or TSP021. We also analyzed the very deeply sequenced L4-DeepSeq dataset  
118 from the English Channel (Gibbons et al, 2013) and found that only 213 of 10,786,733 reads longer than  
119 30 nt showed  $\geq 97\%$  similarity to 14 of our TSP proxy sequences. Under the premise that abundances of

120 inactive spores will be underestimated in nucleic acids-based diversity surveys, the low prevalence of  
121 sequences affiliated with thermospore phylotypes in marine environments suggests that thermophilic  
122 spores are members of the rare biosphere in the oceans (Hubert et al, 2009).

123

124 **Guaymas Basin sediments exhibit characteristics of a source environment for thermophilic**  
125 **endospores**

126 The Guaymas Basin spreading center is the largest in the Gulf of California and harbors a unique  
127 hydrothermal vent system at a water depth of about 2000 m (Weber & Jørgensen, 2002). Unlike other  
128 deep-sea vent sites, the hydrothermal fluids in this basin are driven by deeply buried magmatic  
129 intrusions and rise up to the surface through a sediment cover that has a mean thickness of >100 m  
130 (Curry et al, 1982; Fisher & Becker, 1991). Hydrothermal fluid flow supplies oil compounds (Didyk &  
131 Simoneit, 1989), methane, and small organic compounds to the anaerobic microbial communities close  
132 to the sediment surface. These hydrothermal sediments are anoxic and temperatures at the hot spots  
133 increase rapidly with depth from 3°C to above 100°C within the uppermost 30-40 cm and thus provide  
134 ideal environments for a variety of anaerobic thermophiles (Martens, 1990; Meyer et al, 2013).  
135 Consequently, organisms related to sulfate-reducing *Desulfotomaculum* spp. (*Clostridiales*) (Dhillon et al,  
136 2003; Kniemeyer et al, 2007) (which could contribute to the high thermophilic sulfate reduction rates  
137 measured in situ (Weber & Jørgensen, 2002)), members of the genus *Bacillus* (*Bacillales*) (Dick et al,  
138 2006; Marteinsson et al, 1996), and other thermophilic, endospore-forming bacteria were previously  
139 detected in these sediments (Biddle et al, 2012; Lakhali et al, 2013; Phelps et al, 1998). The considerable  
140 flux of hydrothermal fluids emanating from hydrothermal mounds, chimneys and sediments (Campbell  
141 & Gieskes, 1984) could expel large amounts of thermophilic spores into the water column.

142

143

## 144 **Supplementary Figure Legends**

145

146 **Figure S1.** Maximizing detection of thermophile spores. Impact of different incubation conditions (A,  
147 amendment type; B, incubation time) on the number of thermospore phylotypes detected during  
148 germination experiments.

149

150 **Figure S2.** Beta-diversity analysis (PCoA of weighted UniFrac distances) of bacterial communities before  
151 and after incubation of pasteurized marine sediments at 50°C. Analysis was performed at 800 reads per  
152 library. Sphere sizes and shapes indicate 95% confidence intervals based on 1000 re-samplings. Red  
153 spheres indicate starting samples (T=0 h) and green spheres indicate after incubation (T=120 h).

154

155 **Figure S3.** Phylogeny and geographic distribution of all 146 *Firmicutes* thermospore phylotypes. Scale  
156 bar indicates 1% sequence divergence as inferred from RAxML. Colored bars indicate broad geographic  
157 regions where the thermospore phylotypes were present. Numbers indicate the number of sites at  
158 which a thermospore phylotype was detected.

159

160 **Figure S4.** Site occupancy of thermophilic endospore phylotypes. Graph shows the number of  
161 phylotypes versus the number of sites at which each phylotype was detected. The majority of the 146  
162 thermospore phylotypes is present at 5 sites or less, while 21 phylotypes were present at 15 or more  
163 locations (arbitrarily designated as 'cosmopolitan phylotypes').

164

165 **Figure S5.** Geographic distribution of each cosmopolitan thermospore phylotype. Red circles show the  
166 locations where a phylotype was detected.

167

168 **Figure S6.** Network analysis of thermophile spore co-occurrence **(A)** and location **(B)**. **A**, Networks of co-  
169 occurring thermospore phylotypes. Each node represents a thermospore phylotype. Presence of an  
170 edge between two nodes shows a strong correlation between these two phylotypes, which is indicative  
171 for co-occurrence. Circle size indicates site occupancy. **B**, Location networks. Each node represents a  
172 location, presence of an edge between two nodes corresponds to a high Bray Curtis similarity ( $\geq 0.6$ )  
173 between the endospore communities at these two locations. Circle size indicates thermospore  
174 phylotype richness.

175

176

## 177 **Supplementary Tables**

178

179 **Table S1.** Marine sediment sample description, sediment incubation conditions, thermospore phylotype  
180 richness, and thermophilic sulfate reduction rates.

181

182 **Table S2.** Read number, coverage, and alpha-diversity of bacterial 16S rRNA gene sequence libraries of  
183 pasteurized marine sediments before and after incubation at 50°C.

184

185 **Table S3.** Site occupancy, next relatives, presence/absence at sampling locations and representative 16S  
186 rRNA gene sequences of putative thermophilic *Firmicutes* endospore phylotypes

187

188 **Table S4.** Prevalence of proxy sequences of thermospore phylotypes in publically available 16S rRNA  
189 amplicon pyrosequencing datasets from various environments.

190

191

192 **References**

193

194 Altschul SF, Gish W, Miller W, Myers EW, Lipman DJ. (1990). Basic Local Alignment Search Tool. *J Mol*  
195 *Biol* **215**: 403-410.

196

197 Biddle JF, Cardman Z, Mendlovitz H, Albert DB, Lloyd KG, Boetius A *et al.* (2012). Anaerobic oxidation of  
198 methane at different temperature regimes in Guaymas Basin hydrothermal sediments. *ISME J* **6**: 1018-  
199 1031.

200

201 Boone DR, Liu Y, Zhao Z-J, Balkwill DL, Drake GR, Stevens TO *et al.* (1995). *Bacillus infernus* sp. nov., an  
202 Fe(III)- and Mn(IV)-Reducing Anaerobe from the Deep Terrestrial Subsurface. *Int J Syst Evol Microbiol* **45**:  
203 441-448.

204

205 Campbell AC, Gieskes JM. (1984). Water column anomalies associated with hydrothermal activity in the  
206 Guaymas Basin, Gulf of California. *Earth Planet Sc Lett* **68**: 57-72.

207

208 Caporaso JG, Kuczynski J, Stombaugh J, Bittinger K, Bushman FD, Costello EK *et al.* (2010). QIIME allows  
209 analysis of high-throughput community sequencing data. *Nat Methods* **7**: 335-336.

210

211 Cho J-C, Tiedje JM. (2000). Biogeography and degree of endemism of fluorescent *Pseudomonas* strains  
212 in soil. *Appl Environ Microbiol* **66**: 5448-5456.

213

214 Chu H, Fierer N, Lauber CL, Caporaso JG, Knight R, Grogan P. (2010). Soil bacterial diversity in the Arctic  
215 is not fundamentally different from that found in other biomes. *Environ Microbiol* **12**: 2998-3006.

216

217 Curray J, Moore D, Aguayo J, Aubry M, Einsele G, Fornari D *et al.* (1982). *Initial Rep Deep Sea, Parts I and*  
218 *II, US Govt Printing Office*: 1314pp.

219

220 de Rezende JR, Kjeldsen KU, Hubert CR, Finster K, Loy A, Jorgensen BB. (2013). Dispersal of thermophilic  
221 *Desulfotomaculum* endospores into Baltic Sea sediments over thousands of years. *ISME J* **7**:72-84.

222

223 Dhillon A, Teske A, Dillon J, Stahl DA, Sogin ML. (2003). Molecular characterization of sulfate-reducing  
224 bacteria in the Guaymas Basin. *Appl Environ Microbiol* **69**: 2765-2772.

225

226 Dick GJ, Lee YE, Tebo BM. (2006). Manganese(II)-oxidizing *Bacillus* spores in Guaymas Basin  
227 hydrothermal sediments and plumes. *Appl Environ Microbiol* **72**: 3184-3190.

228

229 Didyk BM, Simoneit BRT. (1989). Hydrothermal oil of Guaymas Basin and implications for petroleum  
230 formation mechanisms. *Nature* **342**: 65-69.

231

232 Fang M-X, Zhang W-W, Zhang Y-Z, Tan H-Q, Zhang X-Q, Wu M *et al.* (2012). *Brassicibacter mesophilus*  
233 gen. nov., sp. nov., a strictly anaerobic bacterium isolated from food industry wastewater. *Int J Syst Evol*  
234 *Microbiol* **62**: 3018-3023.

235

236 Fardeau M-L, Ollivier B, Patel BKC, Dwivedi P, Ragot M, Garcia J-L. (1995). Isolation and Characterization  
237 of a Thermophilic Sulfate-Reducing Bacterium, *Desulfotomaculum thermosapovorans* sp. nov. *Int J Syst*  
238 *Bacteriol* **45**: 218-221.

239

240 Fierer N, Carney KM, Horner-Devine MC, Megonigal JP. (2009). The biogeography of ammonia-oxidizing  
241 bacterial communities in soil. *Microb Ecol* **58**: 435-445.

242

243 Fisher AT, Becker K. (1991). Heat flow, hydrothermal circulation and basalt intrusions in the Guaymas  
244 Basin, Gulf of California. *Earth Planet Sc Lett* **103**: 84-99.

245

246 Galand PE, Potvin M, Casamayor EO, Lovejoy C. (2010). Hydrography shapes bacterial biogeography of  
247 the deep Arctic Ocean. *ISME J* **4**: 564-576.

248

249 García-Martínez J, Rodríguez-Valera F. (2000). Microdiversity of uncultured marine prokaryotes: the  
250 SAR11 cluster and the marine Archaea of Group I. *Mol Ecol* **9**: 935-948.

251

252 Gibbons SM, Caporaso JG, Pirrung M, Field D, Knight R, Gilbert JA. (2013). Evidence for a persistent  
253 microbial seed bank throughout the global ocean. *Proc Natl Acad Sci U S A* **110**: 4651-4655.

254

255 Horner-Devine MC, Lage M, Hughes JB, Bohannon BJM. (2004). A taxa-area relationship for bacteria.  
256 *Nature* **432**: 750-753.

257

258 Hubert C, Loy A, Nickel M, Arnosti C, Baranyi C, Bruchert V *et al.* (2009). A Constant Flux of Diverse  
259 Thermophilic Bacteria into the Cold Arctic Seabed. *Science* **325**: 1541-1544.

260

261 Hubert C, Arnosti C, Bruchert V, Loy A, Vandieken V, Jorgensen BB. (2010). Thermophilic anaerobes in  
262 Arctic marine sediments induced to mineralize complex organic matter at high temperature. *Environ*  
263 *Microbiol* **12**: 1089-1104.

264

265 Khelifi N, Ben Romdhane E, Hedi A, Postec A, Fardeau M-L, Hamdi M *et al.* (2010). Characterization of  
266 *Microaerobacter geothermalis* gen. nov., sp. nov., a novel microaerophilic, nitrate- and nitrite-reducing  
267 thermophilic bacterium isolated from a terrestrial hot spring in Tunisia. *Extremophiles* **14**: 297-304.

268  
269 Kniemeyer O, Musat F, Sievert SM, Knittel K, Wilkes H, Blumenberg M *et al.* (2007). Anaerobic oxidation  
270 of short-chain hydrocarbons by marine sulphate-reducing bacteria. *Nature* **449**: 898-901.

271  
272 Kodama Y, Shumway M, Leinonen R, C INSD. (2012). The sequence read archive: explosive growth of  
273 sequencing data. *Nucleic Acids Res* **40**: D54-D56.

274  
275 L'Haridon S, Miroshnichenko ML, Kostrikina NA, Tindall BJ, Spring S, Schumann P *et al.* (2006).  
276 *Vulcanibacillus modesticaldus* gen. nov., sp. nov., a strictly anaerobic, nitrate-reducing bacterium from  
277 deep-sea hydrothermal vents. *Int J Syst Evol Microbiol* **56**: 1047-1053.

278  
279 Lakhal R, Pradel N, Postec A, Hamdi M, Ollivier B, Godfroy A *et al.* (2013). Characterization of *Vallitalea*  
280 *guaymasensis* gen. nov., sp. nov., a novel marine bacterium, isolated from sediments of Guaymas basin.  
281 *Int J Syst Evol Microbiol*.

282  
283 Lozupone C, Knight R. (2005). UniFrac: a new phylogenetic method for comparing microbial  
284 communities. *Appl Environ Microbiol* **71**: 8228-8235.

285  
286 Lozupone C, Lladser ME, Knights D, Stombaugh J, Knight R. (2011). UniFrac: an effective distance metric  
287 for microbial community comparison. *ISME J* **5**: 169-172.

288  
289 Marteinson V, Birrien J-L, Jeanthon C, Prieur D. (1996). Numerical taxonomic study of thermophilic  
290 *Bacillus* isolated from three geographically separated deep-sea hydrothermal vents. *FEMS Microbiol Ecol*  
291 **21**: 255-266.

292  
293 Martens CS. (1990). Generation of short chain acid anions in hydrothermally altered sediments of the  
294 Guaymas Basin, Gulf of California. *Appl Geoch* **5**: 71-76.

295  
296 Martiny JB, Eisen JA, Penn K, Allison SD, Horner-Devine MC. (2011). Drivers of bacterial beta-diversity  
297 depend on spatial scale. *Proc Natl Acad Sci U S A* **108**: 7850-7854.

298  
299 Meyer S, Wegener G, Lloyd KG, Teske A, Boetius A, Ramette A. (2013). Microbial habitat connectivity  
300 across spatial scales and hydrothermal temperature gradients at Guaymas Basin. *Front Microbiol* **4**.

301  
302 Miller SR, Purugganan MD, Curtis SE. (2006). Molecular population genetics and phenotypic  
303 diversification of two populations of the thermophilic cyanobacterium *Mastigocladus laminosus*. *Appl*  
304 *Environ Microbiol* **72**: 2793-2800.

305  
306 Nemergut DR, Costello EK, Hamady M, Lozupone C, Jiang L, Schmidt SK *et al.* (2011). Global patterns in  
307 the biogeography of bacterial taxa. *Environ Microbiol* **13**: 135-144.

308  
309 Papke RT, Ramsing NB, Bateson MM, Ward DM. (2003). Geographical isolation in hot spring  
310 cyanobacteria. *Environ Microbiol* **5**: 650-659.

311  
312 Phelps CD, Kerkhof LJ, Young LY. (1998). Molecular characterization of a sulfate-reducing consortium  
313 which mineralizes benzene. *FEMS Microbiol Ecol* **27**: 269-279.

314  
315 Rezgui R, Ben Ali Gam Z, Ben Hamed S, Fardeau M-L, Cayol J-L, Maaroufi A *et al.* (2011).  
316 Sporosalibacterium faouarensis gen. nov., sp. nov., a moderately halophilic bacterium isolated from oil-  
317 contaminated soil. *Int J Syst Evol Microbiol* **61**: 99-104.

318  
319 Silva C, Vinuesa P, Eguiarte LE, Souza V, MARTÍNEZ-ROMERO E. (2005). Evolutionary genetics and  
320 biogeographic structure of Rhizobium gallicum sensu lato, a widely distributed bacterial symbiont of  
321 diverse legumes. *Mol Ecol* **14**: 4033-4050.

322  
323 Slobodkin AI, Tourova TP, Kostrikina NA, Lysenko AM, German KE, Bonch-Osmolovskaya EA *et al.* (2006).  
324 Tepidimicrobium ferriphilum gen. nov., sp. nov., a novel moderately thermophilic, Fe(III)-reducing  
325 bacterium of the order Clostridiales. *Int J Syst Evol Microbiol* **56**: 369-372.

326  
327 Tracy BP, Jones SW, Fast AG, Indurthi DC, Papoutsakis ET. (2012). Clostridia: the importance of their  
328 exceptional substrate and metabolite diversity for biofuel and biorefinery applications. *Curr Opin*  
329 *Biotechnol* **23**: 364-381.

330  
331 Voigt B, Schweder T, Sibbald MJJB, Albrecht D, Ehrenreich A, Bernhardt J *et al.* (2006). The extracellular  
332 proteome of Bacillus licheniformis grown in different media and under different nutrient starvation  
333 conditions. *Proteomics* **6**: 268-281.

334  
335 Weber A, Jørgensen BB. (2002). Bacterial sulfate reduction in hydrothermal sediments of the Guaymas  
336 Basin, Gulf of California, Mexico. *Deep-Sea Res Part I: Oceanographic Research Papers* **49**: 827-841.

337  
338 Wery N, Moricet JM, Cuffe V, Jean J, Pignet P, Lesongeur F *et al.* (2001). Caloranaerobacter azorensis  
339 gen. nov., sp. nov., an anaerobic thermophilic bacterium isolated from a deep-sea hydrothermal vent.  
340 *Int J Syst Evol Microbiol* **51**: 1789-1796.

341  
342 Wheeler DL, Barrett T, Benson DA, Bryant SH, Canese K, Chetvernin V *et al.* (2008). Database resources  
343 of the national center for biotechnology information. *Nucleic Acids Res* **36**: D13-D21.

344  
345 Whitaker RJ, Grogan DW, Taylor JW. (2003). Geographic barriers isolate endemic populations of  
346 hyperthermophilic archaea. *Science* **301**: 976-978.

347



348 Wiegel J, Kuk S-U, Kohring GW. (1989). *Clostridium thermobutyricum* sp. nov., a Moderate Thermophile  
349 Isolated from a Cellulolytic Culture, That Produces Butyrate as the Major Product. *Int J Syst Bacteriol* **39**:  
350 199-204.

351  
352 Zavarzina D, Tourova T, Kolganova T, Boulygina E, Zhilina T. (2009). Description of *Anaerobacillus*  
353 *alkalilacustre* gen. nov., sp. nov.—Strictly anaerobic diazotrophic bacillus isolated from soda lake and  
354 transfer of *Bacillus arseniciselenatis*, *Bacillus macyae*, and *Bacillus alkalidiazotrophicus* to *Anaerobacillus*  
355 as the new combinations *A. arseniciselenatis* comb. nov., *A. macyae* comb. nov., and *A.*  
356 *alkalidiazotrophicus* comb. nov. *Microbiology* **78**: 723-731.

### A Amendment

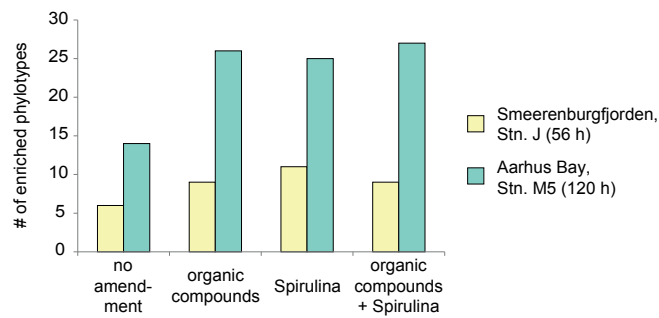

### B Incubation time

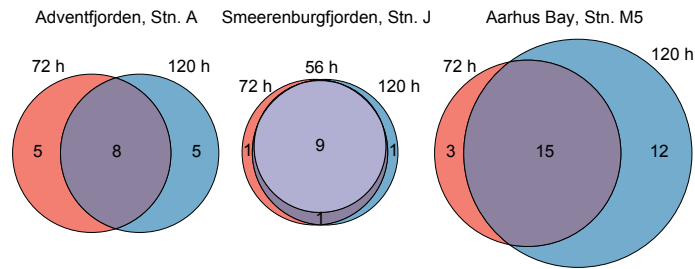

**Supplementary Figure S1.** Maximizing detection of thermophile spores. Impact of different incubation conditions (A, amendment type; B, incubation time) on the number of thermospore phylotypes detected during germination experiments.

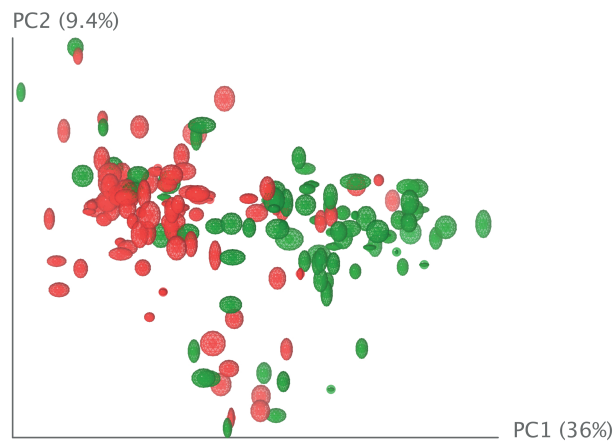

**Supplementary Figure S2.** Beta-diversity analysis (PCoA of weighted UniFrac distances) of bacterial communities before and after incubation of pasteurized marine sediments at 50°C. Analysis was performed at 800 reads per library. Sphere sizes and shapes indicate 95% confidence intervals based on 1000 re-samplings. Red spheres indicate starting samples (T=0 h) and green spheres indicate after incubation (T=120 h).

Supplementary Figure S3  
(1/4)

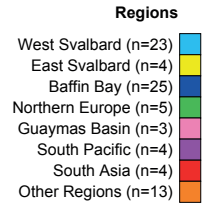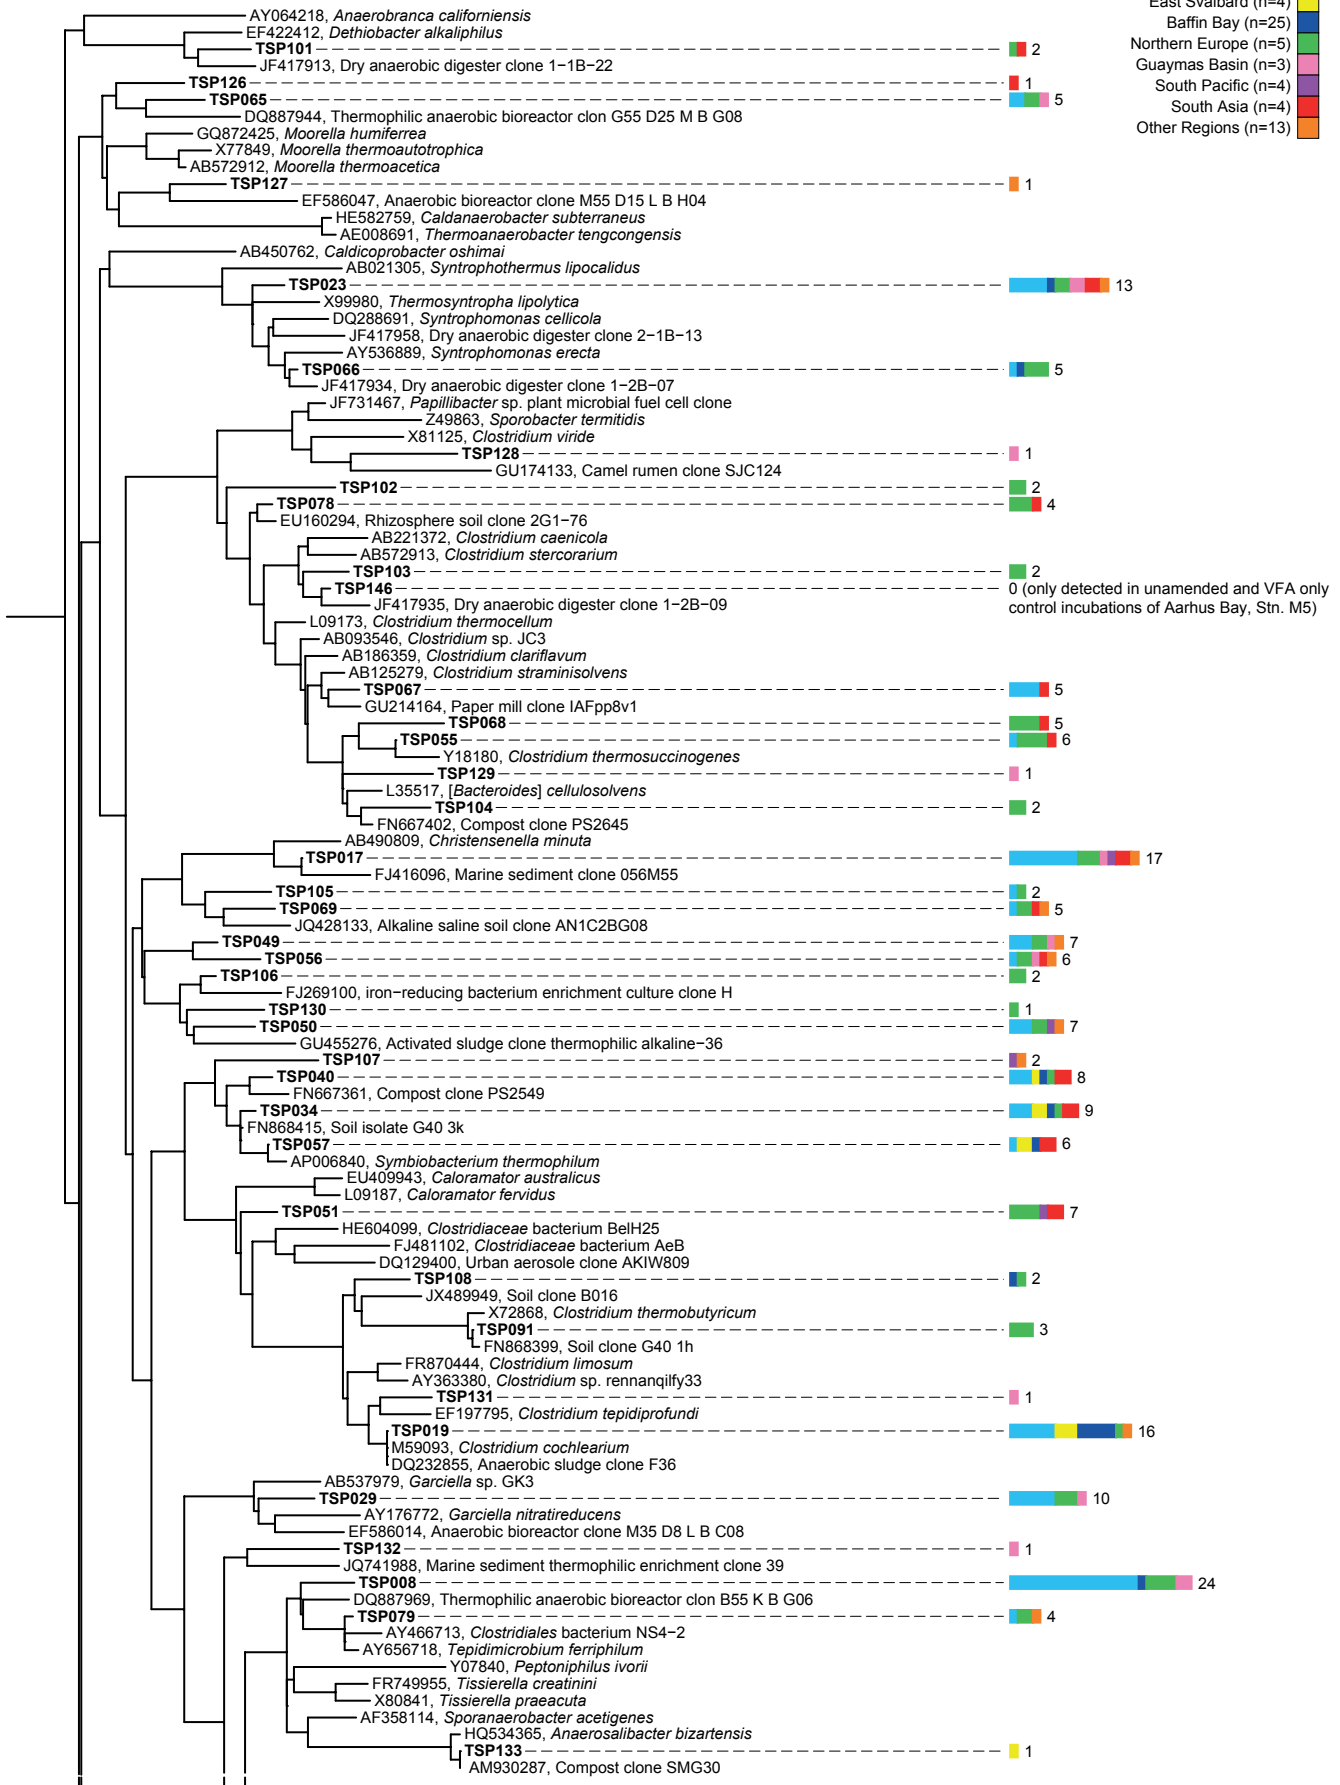

— 0.01

Supplementary Figure S3  
(2/4)

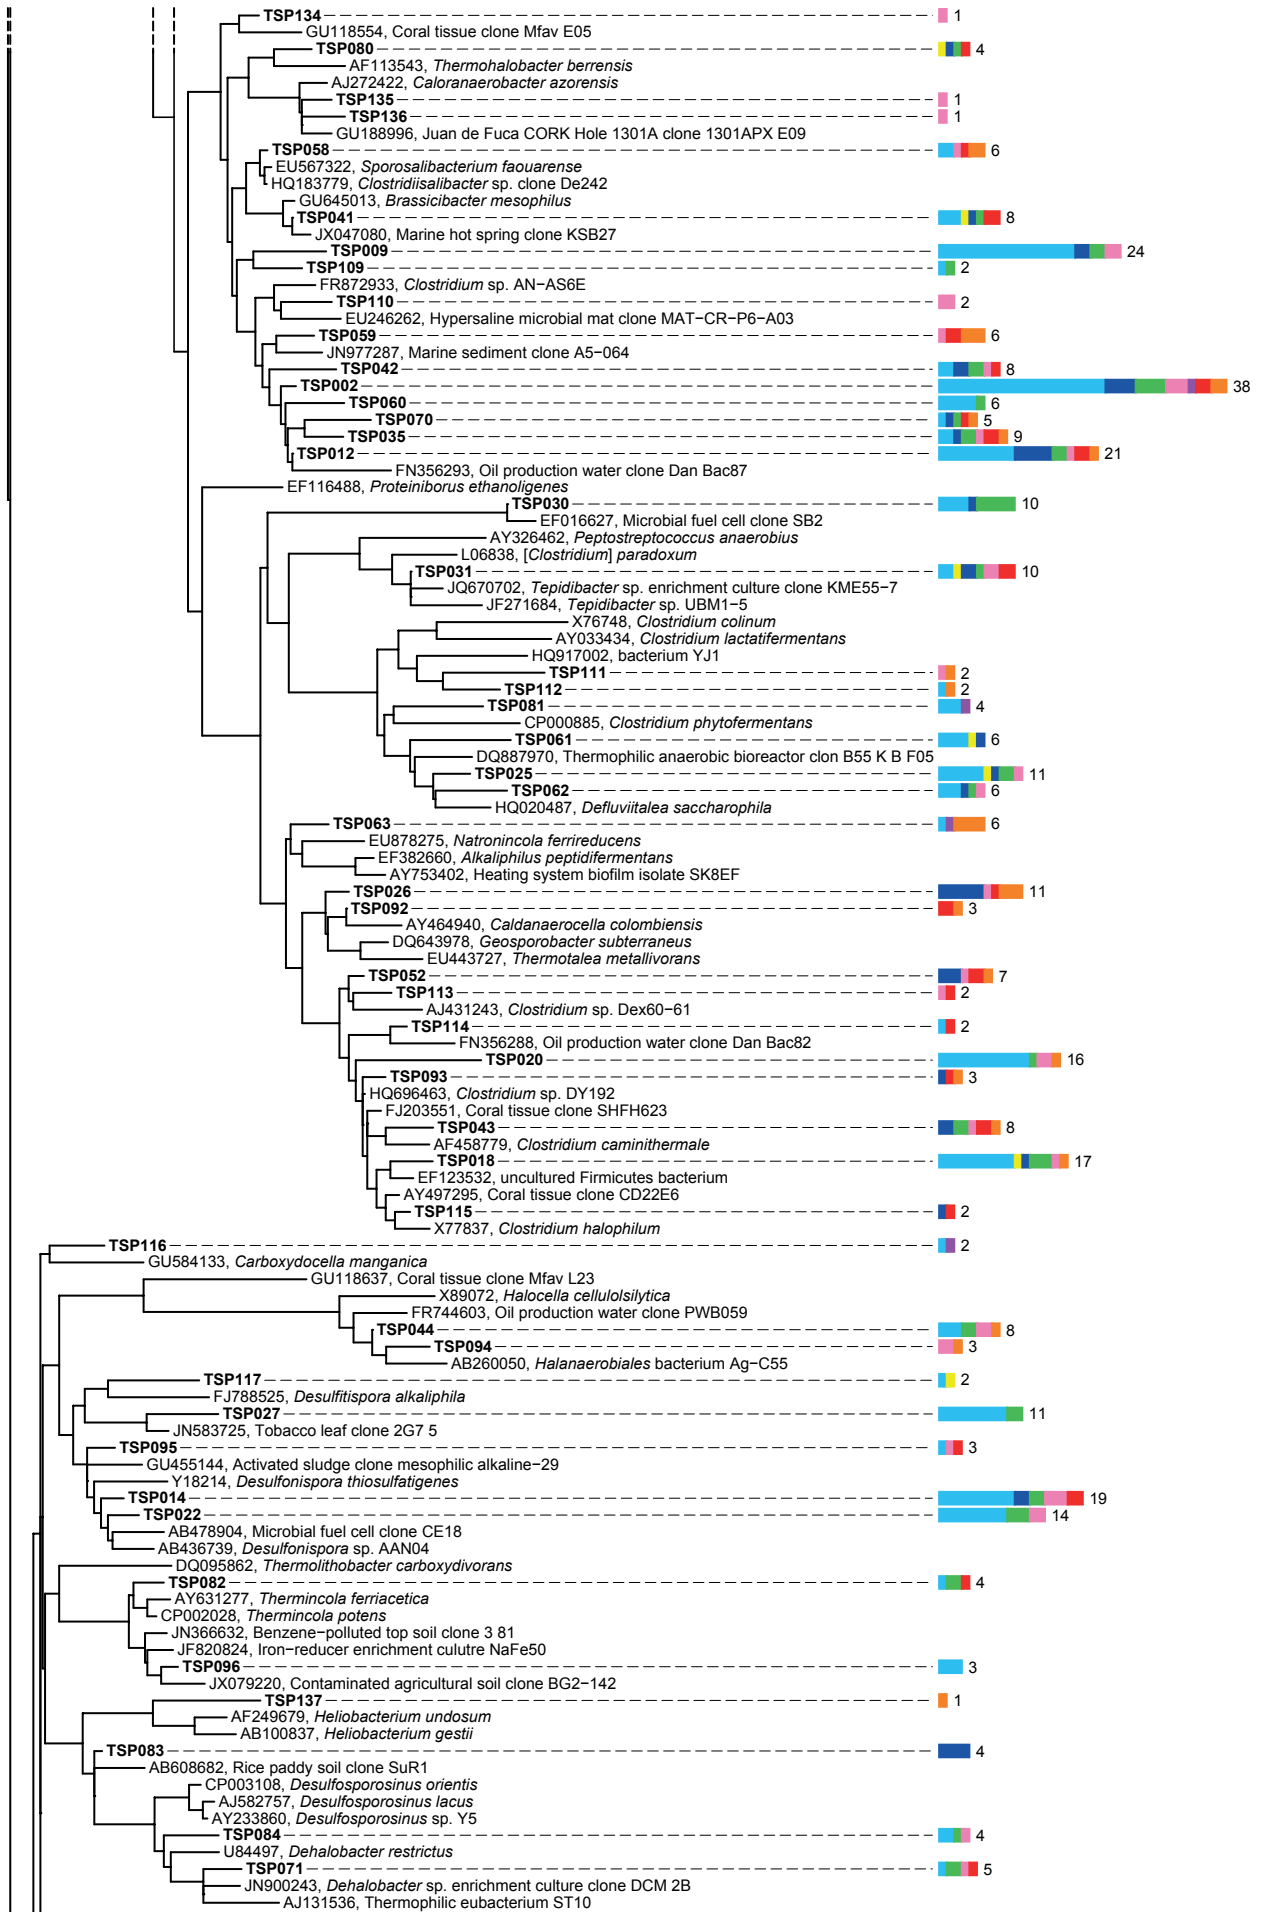

Supplementary Figure S3  
(3/4)

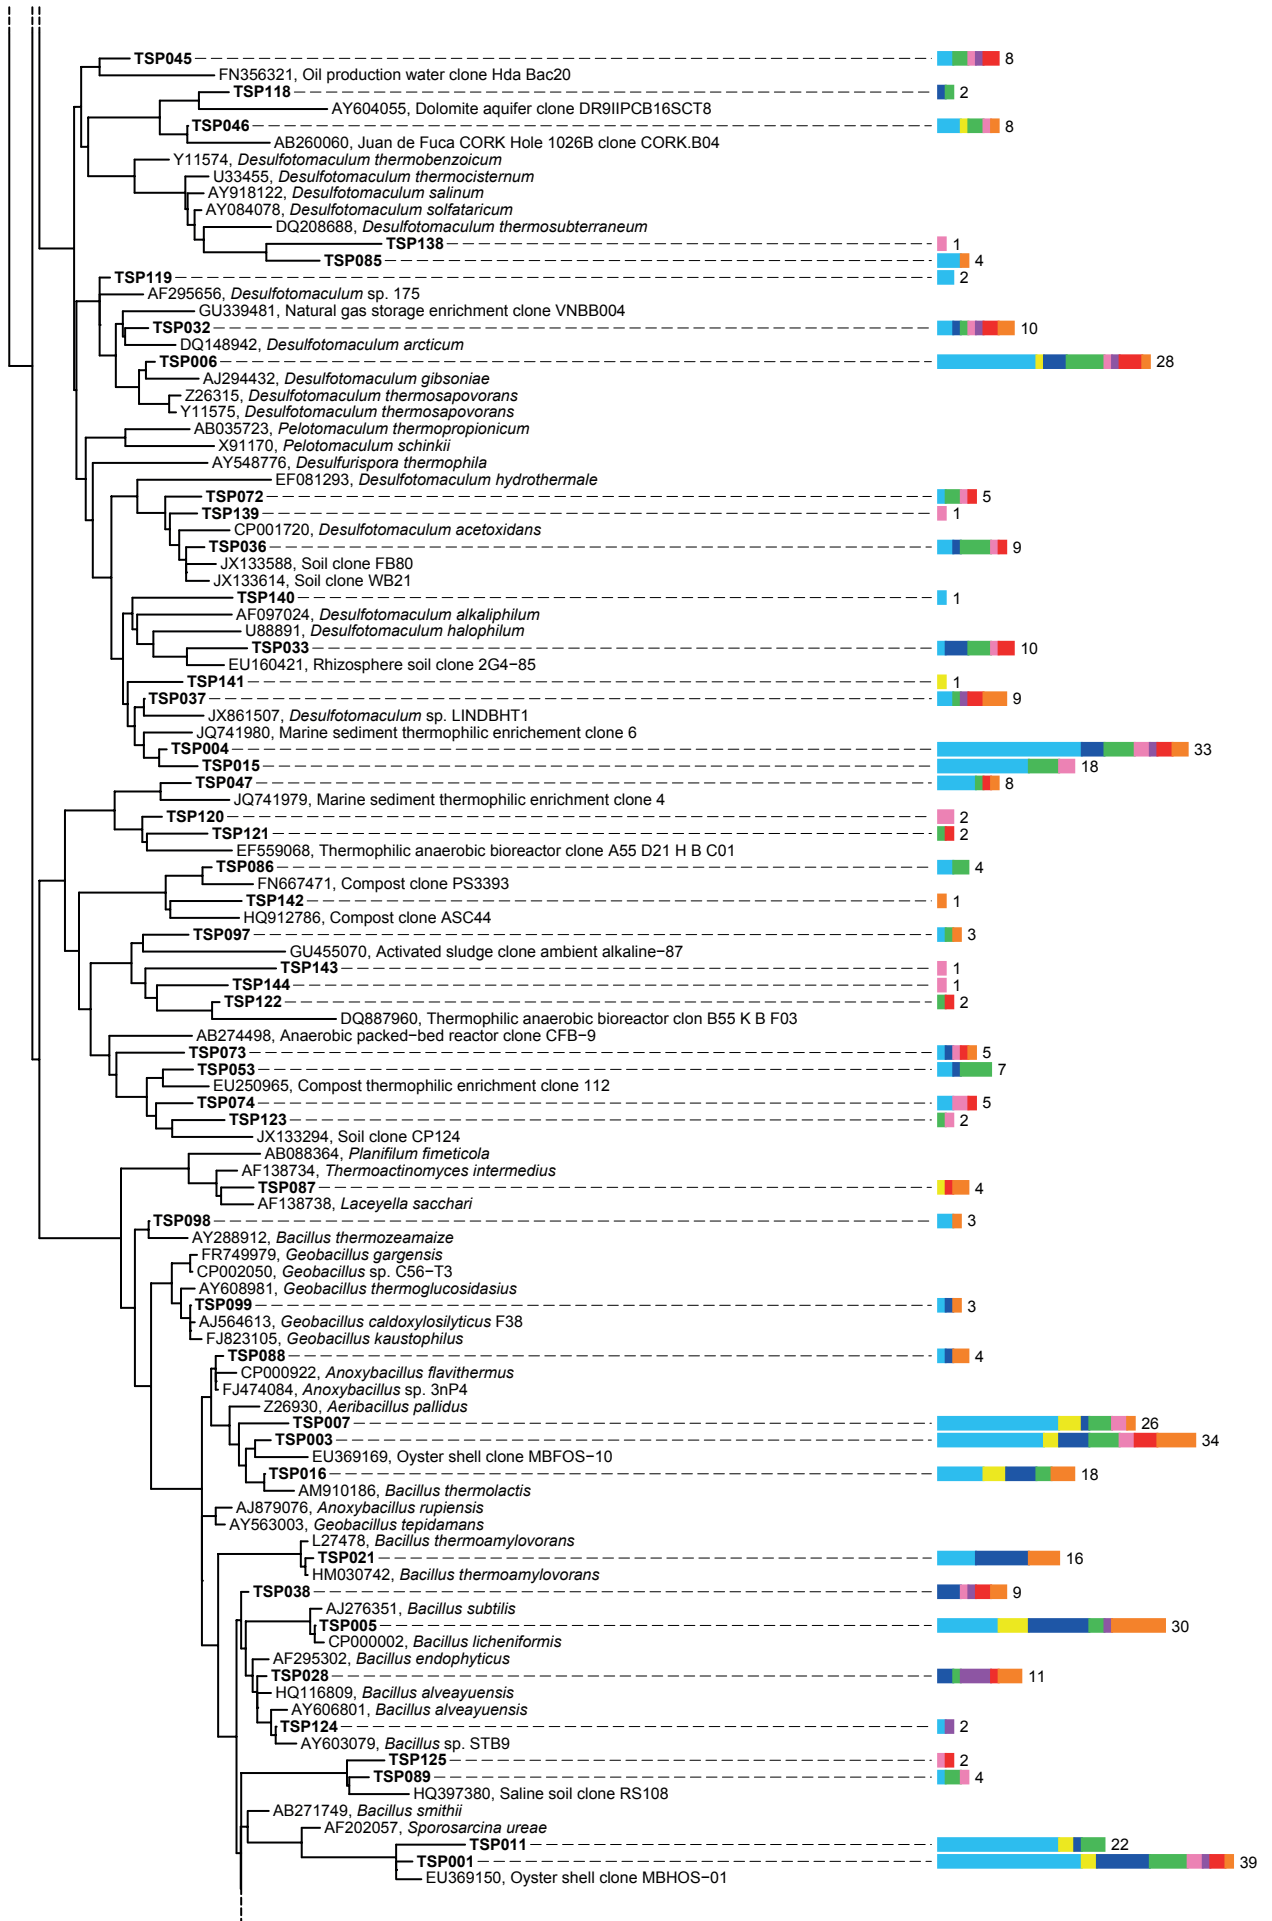

Supplementary Figure S3  
(4/4)

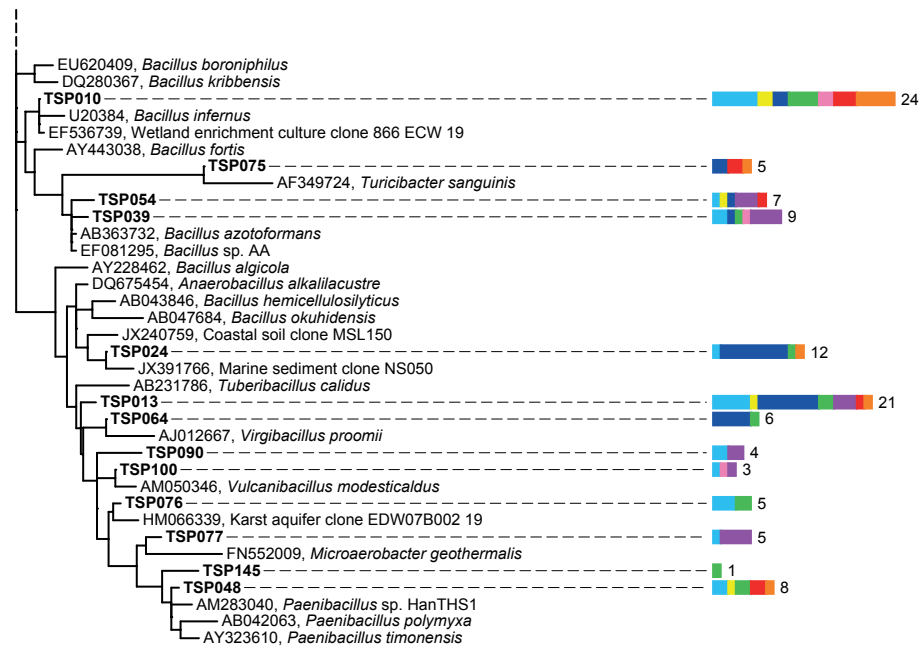

**Supplementary Figure S3.** Phylogeny and geographic distribution of all 146 *Firmicutes* thermospore phylotypes. Scale bar indicates 1% sequence divergence as inferred from RAxML. Colored bars indicate broad geographic regions where the thermospore phylotypes were present. Numbers indicate the number of sites at which a thermospore phylotype was detected.

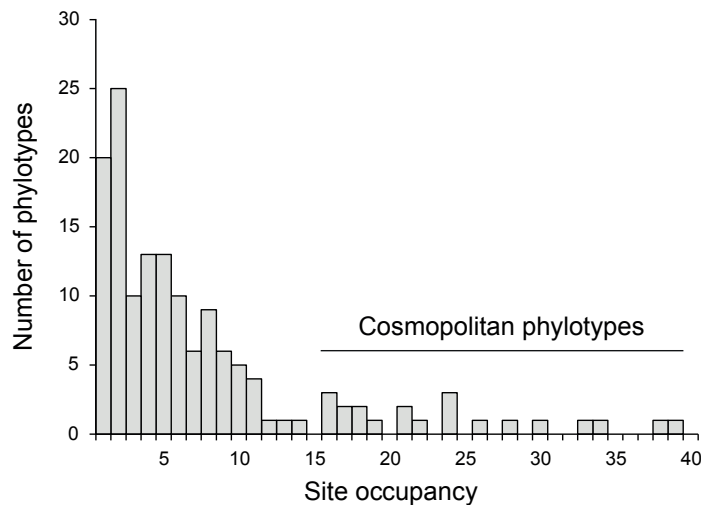

**Supplementary Figure S4.** Site occupancy of thermophilic endospore phylotypes. Graph shows the number of phylotypes versus the number of sites at which each phylotype was detected. The majority of the 146 thermospore phylotypes is present at 5 sites or less, while 21 phylotypes were present at 15 or more locations (arbitrarily designated as ‘cosmopolitan phylotypes’).

Supplementary Figure S5  
(1/2)

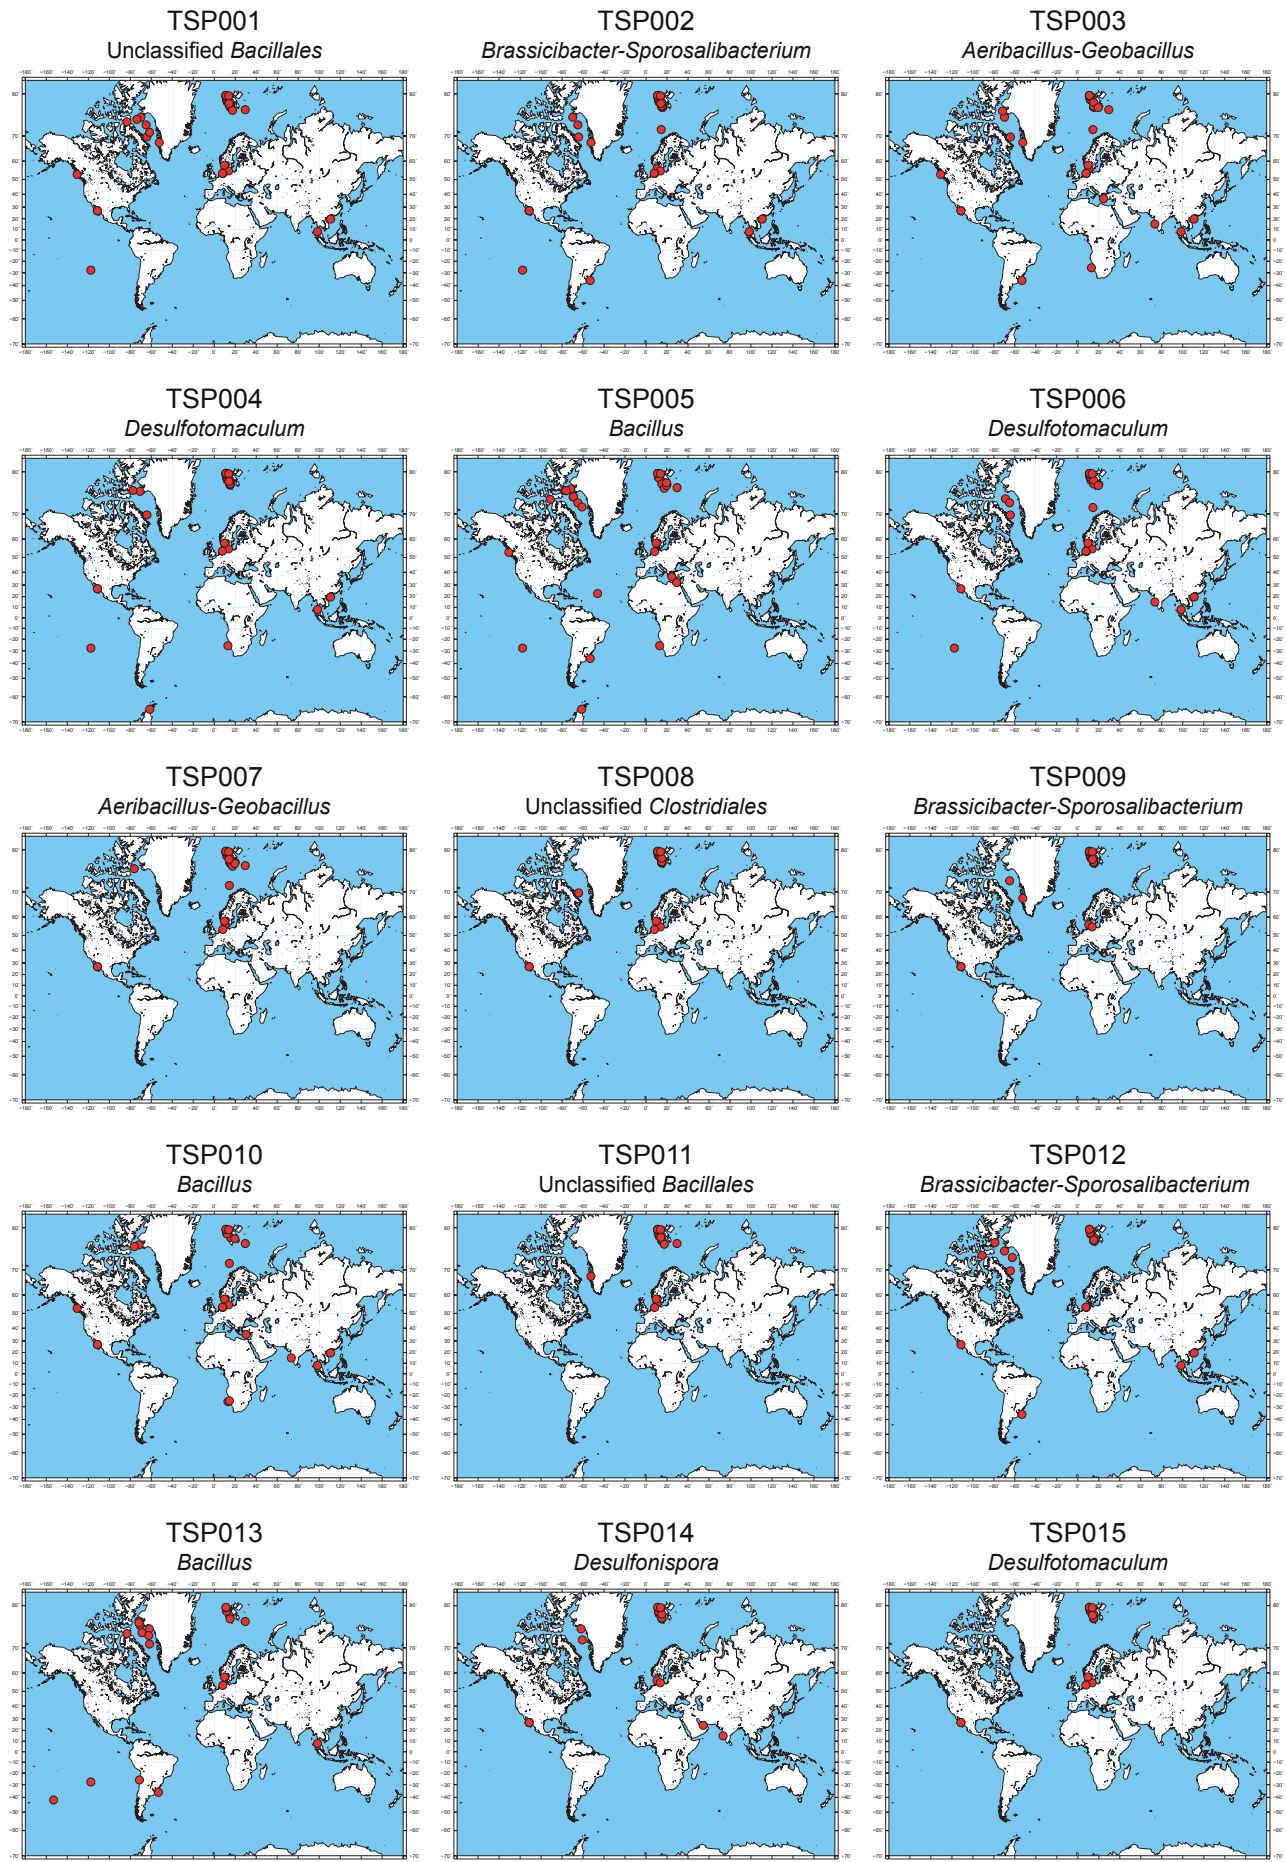



Supplementary Figure S5  
(2/2)

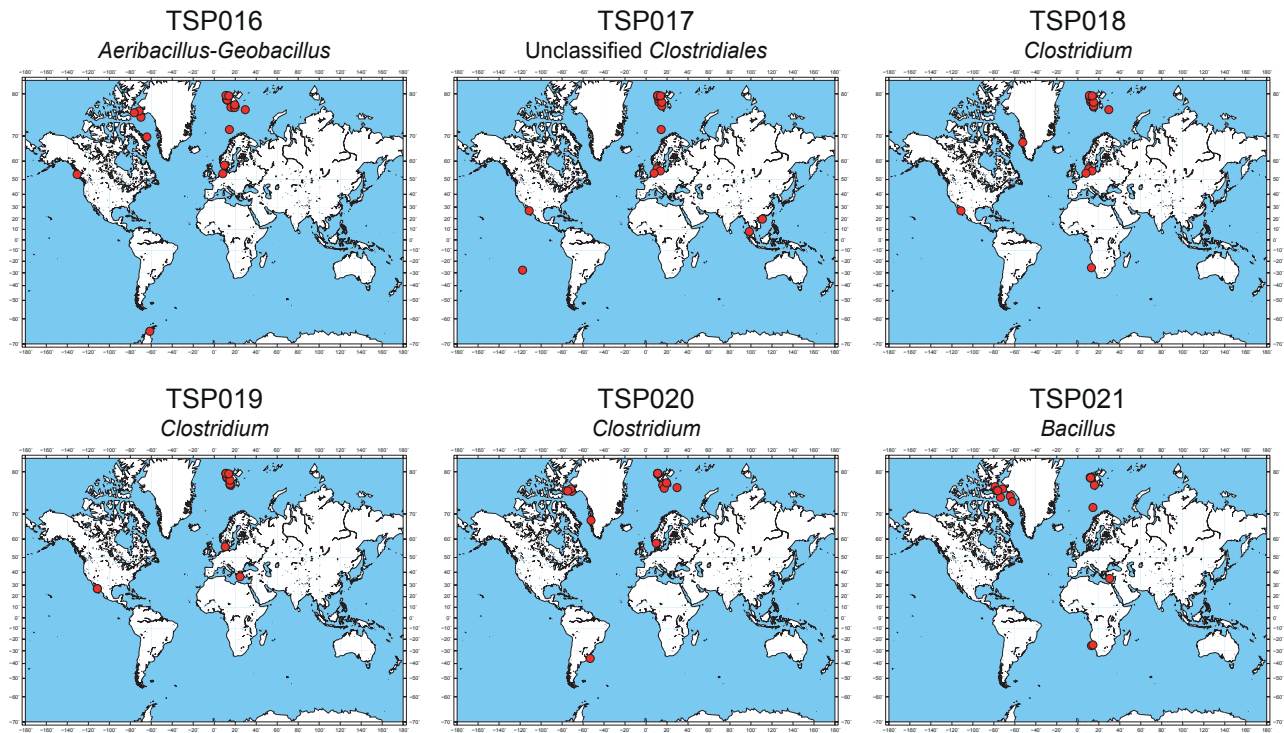

**Supplementary Figure S5.** Geographic distribution of each cosmopolitan thermospore phylotype.

Red circles show the locations where a phylotype was detected.



**A** Phylotype network

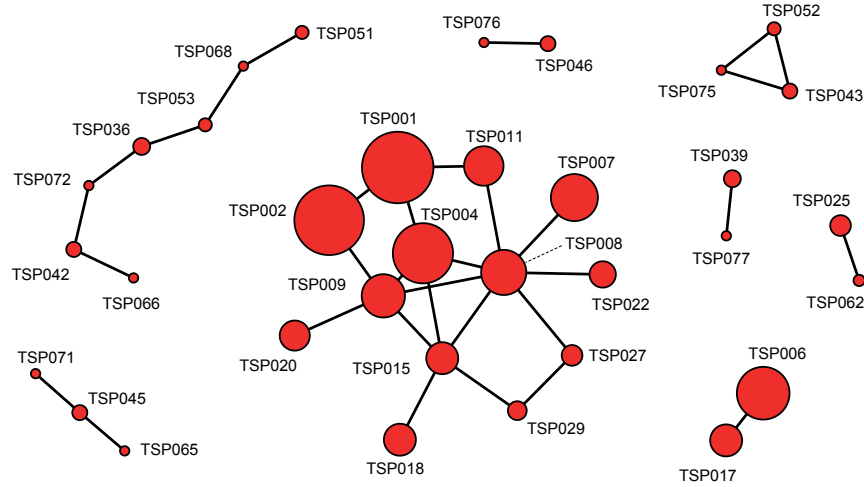

**B** Location network

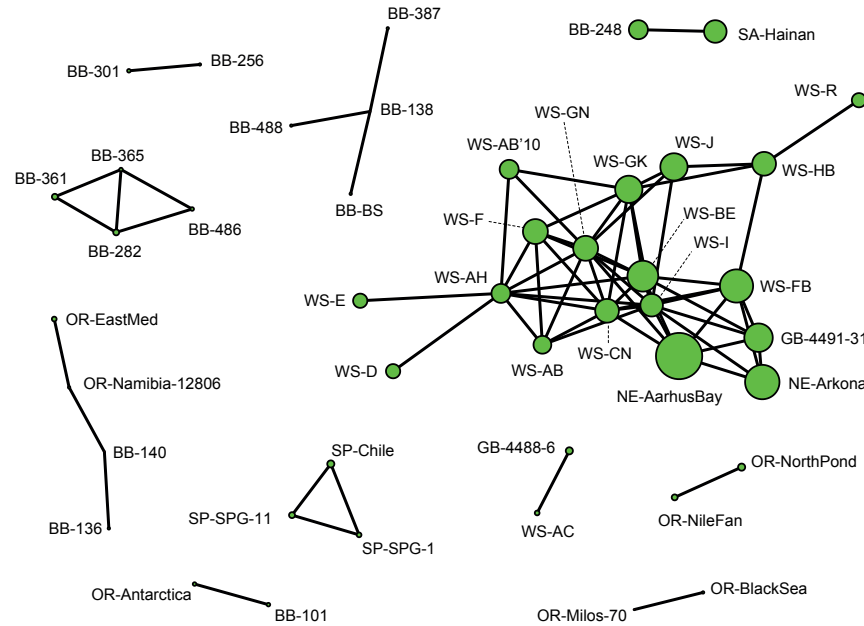

**Supplementary Figure S6.** Network analysis of thermophile spore co-occurrence **(A)** and location **(B)**.

**A**, Networks of co-occurring thermospore phylotypes. Each node represents a thermospore phylotype. Presence of an edge between two nodes shows a strong correlation between these two phylotypes, which is indicative for co-occurrence. Circle size indicates site occupancy. **B**, Location networks. Each node represents a location, presence of an edge between two nodes corresponds to a high Bray Curtis similarity ( $\geq 0.6$ ) between the endospore communities at these two locations. Circle size indicates thermospore phylotype richness.
